# Supplementary material
Source: MDPI journal article supplement (https://www.mdpi.com/1996-1073/12/16/3196)
Supplement: s1 [file s1]

# Optimization of Bio-Hydrogenated Kerosene from Refined Palm Oil by Catalytic Hydrocracking

Praepilas Dujjanutat <sup>1</sup>, Arthit Neramittagapong <sup>2,3</sup> and Pakawadee Kaewkannetra <sup>3,\*</sup>

<sup>1</sup> Graduate School of Khon Kaen University, Khon Kaen 40002, Thailand

<sup>2</sup> Department of Chemical Engineering, Faculty of Engineering, Khon Kaen University, Khon Kaen 40002, Thailand

<sup>3</sup> Center of Alternative Energy Research and Development (AERD), Faculty of Engineering, Khon Kaen University, Khon Kaen 40002, Thailand

\* Correspondence: pakawadee.kku@gmail.com

Received: 18 June 2019; Accepted: 17 August 2019; Published: 20 August 2019

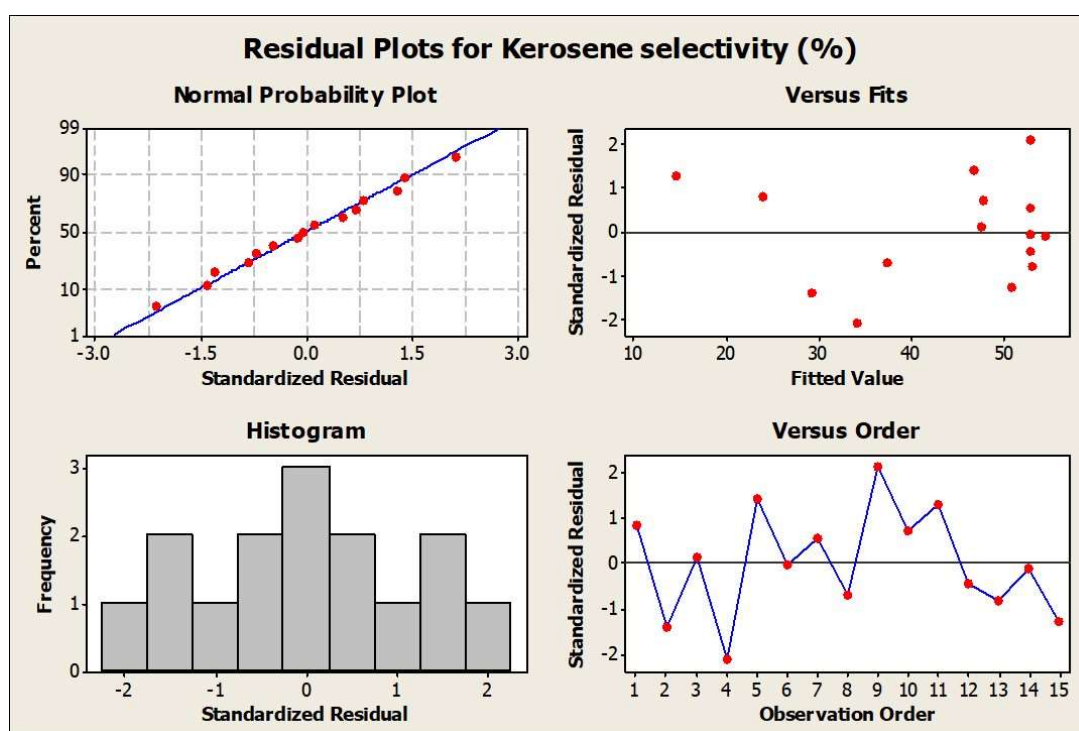

Figure S1. Residual plots of kerosene selectivity.

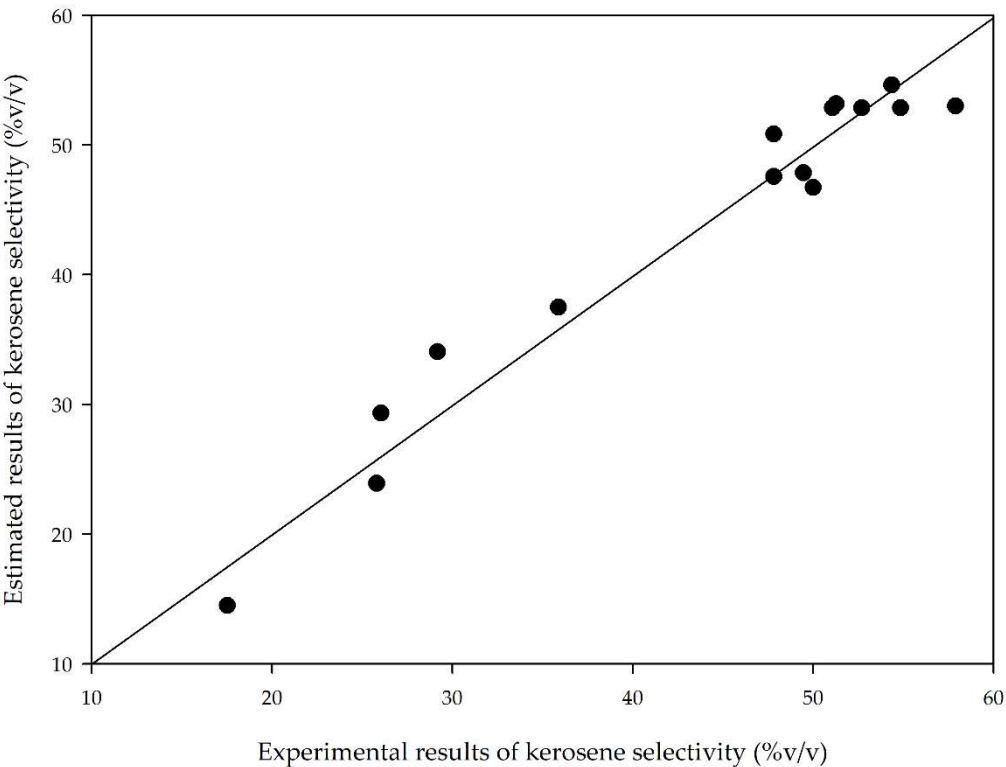

Figure S2. Experimental and estimated results for kerosene selectivity.

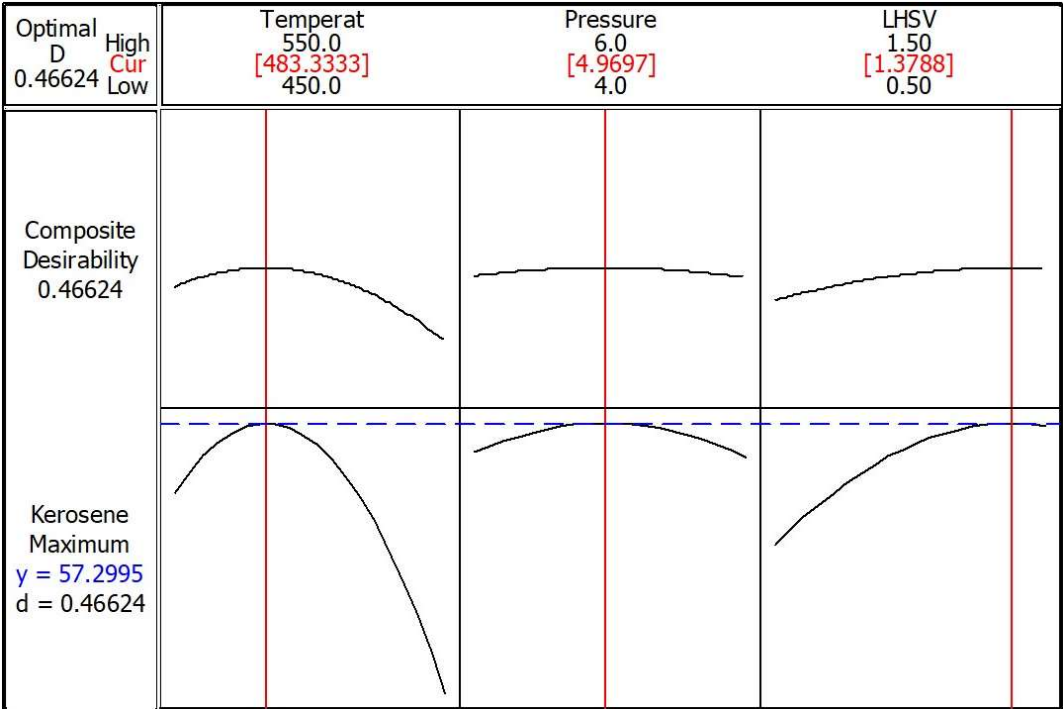

Figure S3. Optimal plot of kerosene selectivity.
